# Supplementary material for: Mercury Contamination in Riverine Sediments and Fish Associated with Artisanal and Small-Scale Gold Mining in Madre de Dios, Peru
Source: PubMed Central journal article supplement (PMC6121527; doi:10.3390/ijerph15081584), 2018-07-26
Supplement: ijerph-15-01584-s001.pdf [file ijerph-15-01584-s001.pdf]

**Supplementary Materials:**

**Table S1.** Sample site list with Global Positioning System coordinates. Sites 1-9 correspond to Tambopata River, sites 10-15 correspond to Malinowski River, and sites 16-25 correspond to Heath River. Sites with \* were also sampled for sediment.

| Site Name                              | Latitude    | Longitude   |
|----------------------------------------|-------------|-------------|
| 1 – Chuncho* (T)                       | 13° 1' 12"  | 69° 31' 13" |
| 2 – Chuncho 2* (T)                     | 13° 0' 9"   | 69° 30' 49" |
| 3 – Colpa Chuncho (T)                  | 12° 59' 1"  | 69° 29' 49" |
| 4 – 8 Gallinas 1 (T)                   | 12° 57' 59" | 69° 29' 50" |
| 5 – 8 Gallinas 2 (T)                   | 12° 57' 33" | 69° 29' 52" |
| 6 – 8 Gallinas 3* (T)                  | 13° 4' 0"   | 69° 34' 13" |
| 7 – Isla de Monos* (T)                 | 13° 0' 36"  | 69° 30' 34" |
| 8 – Isla de Monos 2 (T)                | 12° 57' 47" | 69° 30' 45" |
| 9 – Boca Alto Tambopata (T)            | 12° 57' 11" | 69° 31' 38" |
| 10 – Alto Tetas Malinowski (M)         | 12° 56' 41" | 69° 34' 29" |
| 11 – Aguas Negras Alto Malinowski* (M) | 12° 57' 16" | 69° 35' 31" |
| 12 – Alto Malinowski (M)               | 12° 56' 45" | 69° 34' 42" |
| 13 – Bajo Malinowski* (M)              | 12° 56' 57" | 69° 33' 17" |
| 14 – Quebrada Yarinal* (M)             | 12° 54' 37" | 69° 38' 47" |
| 15 – Tambopata Boca Malinowski (M)     | 12° 54' 9"  | 69° 31' 6"  |
| 16 – Lago Guacamayo 1* (H)             | 12° 41' 36" | 68° 44' 10" |
| 17 – Lago Guacamayo 2 (H)              | 12° 41' 28" | 68° 43' 48" |
| 18 – Lago Guacamayo 3 (H)              | 12° 41' 49" | 68° 44' 10" |
| 19 – Quebrada Maquisapa* (H)           | 12° 39' 60" | 68° 43' 52" |
| 20 – Quebrada San Antonio* (H)         | 12° 39' 32" | 68° 44' 17" |
| 21 – Quebrada Dario (H)                | 12° 38' 22" | 68° 44' 18" |
| 22 – Alto Heath* (H)                   | 12° 50' 32" | 68° 50' 15" |
| 23 – Lago Heath (H)                    | 12° 48' 26" | 68° 50' 5"  |
| 24 – Grande Piedra* (H)                | 12° 44' 32" | 68° 45' 58" |
| 25 – Quebrada Boli* (H)                | 12° 42' 49" | 68° 43' 43" |

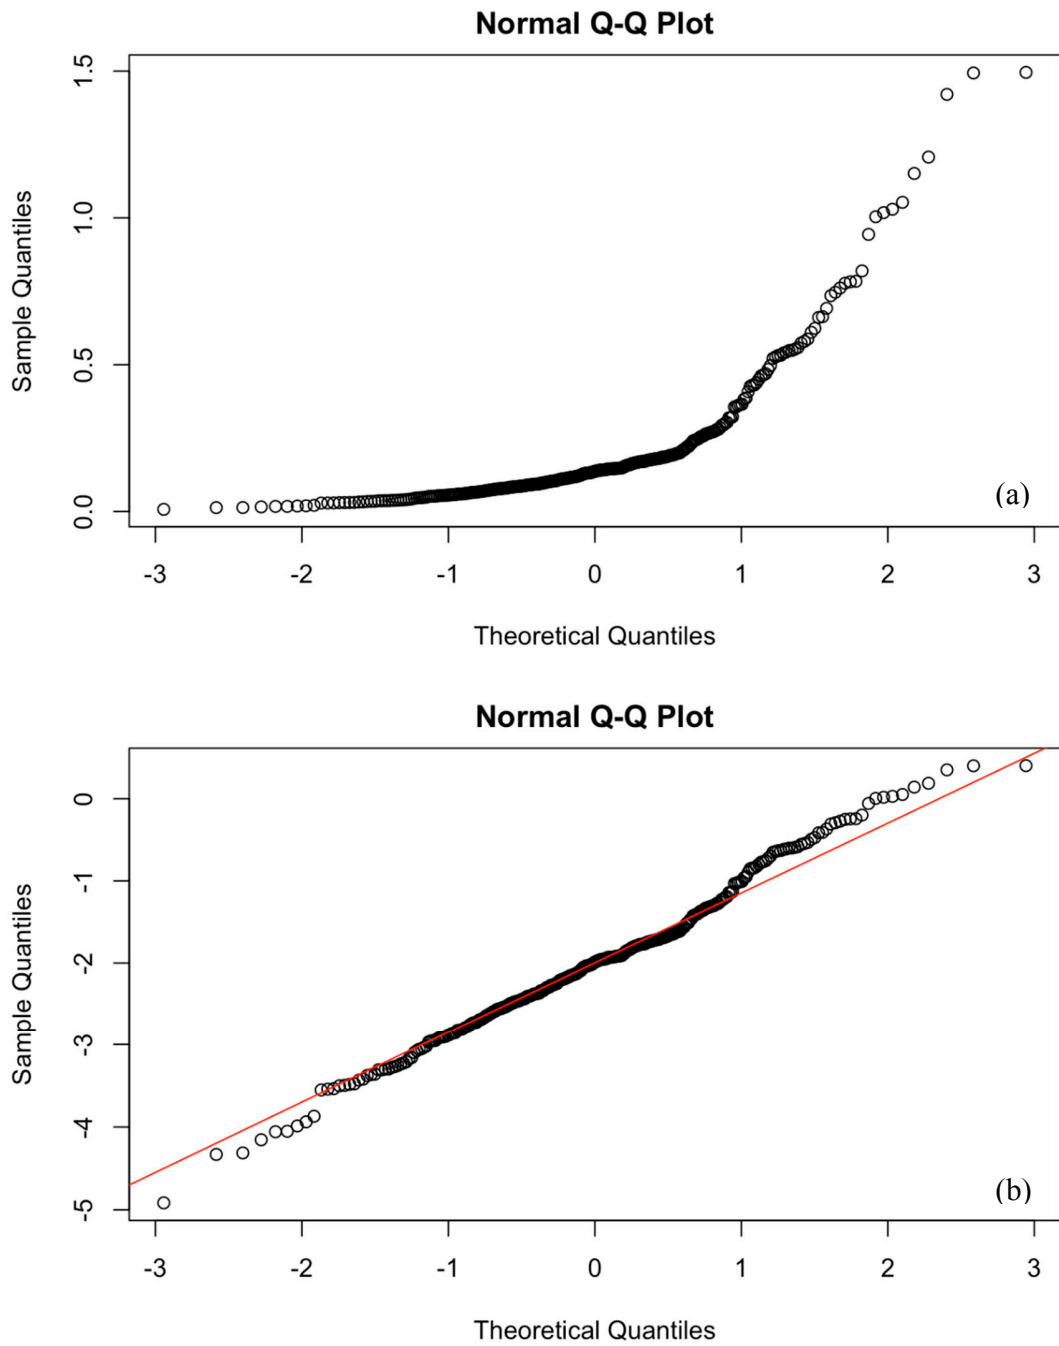

**Figure S1.** Quantile-quantile plots examining normality of  $Hg_{fish}$  data: (a) raw  $Hg_{fish}$  data and (b) log-transformed  $Hg_{fish}$  data.

**Table S2.** Raw mercury concentrations for fish samples collected during both wet and dry season sampling events for all rivers combined. Sampling Location identifies where each specie was collected – Tambopata River (T), Malinowski River (M), and Heath River (H).

| Common Name | Species                                                                                    | Samples<br>(n=308) | Sampling<br>Location <sup>1</sup> | T-Hg (mg/kg)<br>mean (Min, Max) | Strd. Dev.<br>(mg/kg) | Mean Length<br>(mm) | Mean Weight<br>(g) |
|-------------|--------------------------------------------------------------------------------------------|--------------------|-----------------------------------|---------------------------------|-----------------------|---------------------|--------------------|
| Añashua     | <i>Crenicichla semicincta</i>                                                              | 1                  | T                                 | 0.05                            | --                    | 80                  | 8                  |
| Anguila     | <i>Electrophorus electricus</i>                                                            | 1                  | T                                 | 0.50                            | --                    | 720                 | 1520               |
| Bagre       | <i>Exallodontus agaunai</i> ,<br><i>Megalonema platycephalum</i> ,<br><i>Pimelodus sp.</i> | 21                 | T, M, H                           | 0.13 (0.03, 0.24)               | 0.06                  | 182 (118, 236)      | 139 (24, 260)      |
| Bocachico   | <i>Prochilodus nigricans</i>                                                               | 39                 | T, M, H                           | 0.10 (0.02, 0.28)               | 0.06                  | 301 (208, 380)      | 722 (260, 1460)    |
| Bocon, Toa  | <i>Ageniosus inermis</i>                                                                   | 3                  | H                                 | 0.60 (0.47, 0.74)               | 0.14                  | 377 (325, 411)      | 953 (620, 1140)    |
| Bujurqui    | <i>Satanoperca jurupari</i>                                                                | 18                 | M                                 | 0.14 (0.09, 0.21)               | 0.04                  | 114 (104, 134)      | 49 (35, 77)        |
| Canero      | <i>Cetopsis coecutiens</i><br><i>Hypostomus sp.</i>                                        | 2                  | T, M                              | 0.32 (0.17, 0.47)               | 0.21                  | 120 (77, 164)       | 64 (8, 120)        |
| Carachama   | <i>Lamontichthys filamentosus</i> ,<br><i>Squaliforma emarginata</i>                       | 24                 | T, M, H                           | 0.04 (0.02, 0.08)               | 0.02                  | 190 (69, 265)       | 162 (8, 338)       |
| Chambira    | <i>Cynodon gibbus</i>                                                                      | 7                  | T, H                              | 0.72 (0.12, 1.20)               | 0.41                  | 248 (151, 363)      | 214 (80, 390)      |
| Chio-chio   | <i>Psectrogaster rutiloides</i>                                                            | 1                  | H                                 | 0.04                            | --                    | 158                 | 140                |
| Corvina     | <i>Pachypops fourcroyi</i><br><i>Charax sp.</i>                                            | 1                  | T                                 | 0.43                            | --                    | 196                 | 130                |
| Dentón      | <i>Cynopotamus amazonus</i> ,<br><i>Galleocharax sp.</i> ,<br><i>Roebooides affinis</i>    | 7                  | T                                 | 0.40 (0.16, 0.61)               | 0.18                  | 156 (79, 228)       | 67 (7, 160)        |
| Doncella    | <i>Pseudoplatystoma tigrinum</i>                                                           | 2                  | T, H                              | 0.86 (0.78, 0.94)               | 0.12                  | 641 (606, 676)      | 3595 (3360, 3830)  |
| Gamitana    | <i>Colossoma macropomum</i>                                                                | 1                  | H                                 | 0.16                            | --                    | 432                 | 3320               |
| Huasaco     | <i>Hoplias malabaricus</i>                                                                 | 6                  | T, M                              | 0.15 (0.10, 0.22)               | 0.04                  | 143 (77, 205)       | 71 (7, 160)        |
| Lamista     | <i>Tetragonopterus argenteus</i>                                                           | 1                  | T                                 | 0.09                            | --                    | 112                 | 70                 |

|               |                                                                                                                                    |    |         |                   |       |                |                   |
|---------------|------------------------------------------------------------------------------------------------------------------------------------|----|---------|-------------------|-------|----------------|-------------------|
| Lisa          | <i>Leporinus friderici</i>                                                                                                         | 4  | H       | 0.11 (0.08, 0.14) | 0.04  | 255 (240, 271) | 348 (260, 430)    |
| Macana        | <i>Eigenmannia virescens</i> ,<br><i>Sternarchorhynchus sp</i>                                                                     | 6  | M       | 0.14 (0.07, 0.20) | 0.05  | 192 (151, 232) | 12 (7, 15)        |
| Mota Punteada | <i>Calophysus macropterus</i>                                                                                                      | 1  | M       | 0.29              | --    | 399            | 540               |
| Palometa      | <i>Mylossoma aureum</i> ,<br><i>Mylossoma duriventre</i> ,<br><i>Myleus sp</i>                                                     | 10 | M, H    | 0.05 (0.01, 0.09) | 0.03  | 154 (105, 217) | 169 (43, 390)     |
| Paña          | <i>Pristobrycon sp</i> ,<br><i>Serrasalmus cf compressus</i> ,<br><i>Serrasalmus rhombeus</i> ,<br><i>Serrasalmus spilopleuras</i> | 31 | M, H    | 0.53 (0.08, 1.50) | 0.38  | 136 (75, 280)  | 145 (8, 830)      |
| Pejeperro     | <i>Acestrorhynchus falcatus</i>                                                                                                    | 7  | M       | 0.34 (0.23, 0.44) | 0.07  | 125 (104, 150) | 28 (12, 47)       |
| Pico de Pato  | <i>Hemisorubim platyrhynchos</i> ,<br><i>Platystomatichthys sturio</i> ,<br><i>Sorubim lima</i>                                    | 9  | T, M, H | 0.53 (0.13, 1.15) | 0.38  | 225 (91, 442)  | 180 (4, 630)      |
| Pirillo       | <i>Leptodoras acipenserinus</i> ,<br><i>Nemadoras humeralis</i> ,<br><i>Trachydoras steindachneri</i>                              | 5  | T, H    | 0.31 (0.20, 0.45) | 0.10  | 168 (91, 215)  | 76 (11, 105)      |
| Piro          | <i>Megalodoras uranoscopus</i>                                                                                                     | 3  | H       | 0.02 (0.01, 0.02) | 0.002 | 382 (333, 418) | 1737 (1060, 2240) |
| Platanito     | <i>Auchenipterichthys sp</i>                                                                                                       | 2  | M       | 0.11 (0.10, 0.11) | 0.001 | 93 (90, 95)    | 9 (9, 10)         |
| Puma Zungaro  | <i>Pseudoplatystoma tigrinum</i>                                                                                                   | 1  | H       | 0.82              | --    | 980            | 10500             |
| Raya          | <i>Potamotrygon falkneri</i> ,<br><i>Potamotrygon sp</i>                                                                           | 3  | T, M    | 0.56 (0.53, 0.59) | 0.03  | 636 (540, 697) | 2227 (1450, 3050) |
| Sábalo        | <i>Brycon amazonicus</i>                                                                                                           | 4  | T, H    | 0.14 (0.05, 0.28) | 0.10  | 391 (350, 474) | 1445 (840, 2880)  |
| Sapamama      | <i>Triportheus albus</i> ,<br><i>Triportheus angulatus</i>                                                                         | 10 | T, H    | 0.14 (0.07, 0.29) | 0.08  | 171 (148, 193) | 104 (47, 160)     |
| Sapocunchi    | <i>Trachelyopterus cf galeatus</i>                                                                                                 | 1  | H       | 0.10              | --    | 168            | 150               |
| Sardina       | <i>Astyanax abramis</i> ,<br><i>Astyanax bimaculatus</i> ,                                                                         | 6  | M       | 0.09 (0.05, 0.19) | 0.05  | 82 (66, 104)   | 15 (9, 29)        |

|            |                                                        |    |      |                    |      |                |                |
|------------|--------------------------------------------------------|----|------|--------------------|------|----------------|----------------|
|            | <i>Astyanax maximus</i>                                |    |      |                    |      |                |                |
| Tucunare   | <i>Cichla monoculus</i>                                | 1  | H    | 0.19               | --   | 203            | 210            |
| Turushuki  | <i>Oxydoras niger</i>                                  | 1  | H    | 0.25               | --   | 540            | 2440           |
| Yahuarachi | <i>Potamorhina altamazonica</i>                        | 64 | H    | 0.12 (0.03, 0.026) | 0.05 | 215 (165, 289) | 268 (90, 620)  |
| Yulilla    | <i>Anodus elongatus,</i><br><i>Hemiodus microlepis</i> | 4  | T, H | 0.28 (0.06, 0.56)  | 0.21 | 262 (204, 294) | 298 (250, 340) |

---

<sup>1</sup> Tambopata River (T), Malinowski River (M), and Heath River (H).
